# Supplementary material
Source: publisher figshare collection journal article supplement (https://future-science-group.figshare.com/ndownloader/files/28090428)
Supplement: Supplementary file 1 [file 28090428]

**Supplementary Table 1. miRNAs significantly correlated with FST Escape Time in Males**

| **Supplementary Table 1.**  miRNAs significantly correlated with FST Escape Time in Males | | |
| --- | --- | --- |
| **miRNA** | **Significance** | **R** |
| Amyg-let-7e-3p | 0.044 | -.823* |
| Amyg-miR-1298 | 0.043 | .826* |
| Amyg-miR-148b-5p | 0.035 | -.844* |
| Amyg-miR-184 | 0.020 | .882* |
| Amyg-miR-191a-5p | 0.013 | -.905* |
| Amyg-miR-204-5p | 0.011 | .913* |
| Amyg-miR-25-5p | 0.006 | -.937** |
| Amyg-miR-26b-3p | 0.047 | -.818* |
| Amyg-miR-28-5p | 0.013 | -.904* |
| Amyg-miR-411-3p | 0.042 | -.829* |
| Amyg-miR-490-3p | 0.016 | -.894* |
| Amyg-miR-495 | 0.035 | .843* |
| Amyg-miR-532-5p | 0.027 | .862* |
| Amyg-miR-6315 | 0.023 | -.874* |
| Amyg-miR-879-3p | 0.004 | -.948** |
| Hipp-miR-216b-5p | 0.016 | -.895* |
| Hipp-miR-224-5p | 0.007 | -.930** |
| Hipp-miR-26a-5p | 0.036 | .841* |
| Hipp-miR-3084a-1-5p | 0.014 | .900* |
| Hipp-miR-653-5p | 0.031 | -.852* |
| PFC-miR-106b-5p | 0.006 | .938** |
| PFC-miR-124-3p | 0.015 | .899* |
| PFC-miR-125b-2-3p | 0.001 | -.975** |
| PFC-miR-126a-5p | 0.024 | .872* |
| PFC-miR-1306-5p | 0.012 | .910* |
| PFC-miR-130a-3p | 0.038 | .836* |
| PFC-miR-135a-5p | 0.002 | .961** |
| PFC-miR-135b-5p | 0.018 | .888* |
| PFC-miR-139-3p | 0.006 | -.934** |
| PFC-miR-143-5p | 0.025 | .869* |
| PFC-miR-148a-3p | 0.046 | -.820* |
| PFC-miR-148b-3p | 0.014 | -.902* |
| PFC-miR-150-3p | 0.002 | -.967** |
| PFC-miR-151-3p | 0.009 | -.922** |
| PFC-miR-154-3p | 0.047 | .818* |
| PFC-miR-15a-5p | 0.044 | .823* |
| PFC-miR-16-5p | 0.002 | .963** |
| PFC-miR-17-5p | 0.010 | .916* |
| PFC-miR-181c-5p | 0.008 | .924** |
| PFC-miR-186-5p | 0.010 | .919** |
| PFC-miR-187-3p | 0.016 | .895* |
| PFC-miR-190a-5p | 0.023 | .874* |
| PFC-miR-195-5p | 0.020 | .883* |
| PFC-miR-19b-3p | 0.026 | .865* |
| PFC-miR-212-5p | 0.010 | -.918** |
| PFC-miR-221-5p | 0.027 | -.861* |
| PFC-miR-222-3p | 0.003 | -.954** |
| PFC-miR-28-5p | 0.000 | .982** |
| PFC-miR-29a-3p | 0.010 | .916* |
| PFC-miR-29b-5p | 0.040 | .832* |
| PFC-miR-3068-5p | 0.031 | .853* |
| PFC-miR-30a-3p | 0.009 | -.923** |
| PFC-miR-30b-3p | 0.036 | -.842* |
| PFC-miR-30e-3p | 0.030 | -.855* |
| PFC-miR-3102 | 0.014 | .903* |
| PFC-miR-335 | 0.001 | .975** |
| PFC-miR-337-5p | 0.011 | -.912* |
| PFC-miR-344b-5p | 0.024 | -.870* |
| PFC-miR-345-3p | 0.011 | .912* |
| PFC-miR-369-5p | 0.011 | -.914* |
| PFC-miR-370-3p | 0.002 | -.961** |
| PFC-miR-370-5p | 0.013 | -.906* |
| PFC-miR-376b-3p | 0.033 | .849* |
| PFC-miR-379-3p | 0.049 | -.813* |
| PFC-miR-382-5p | 0.006 | -.934** |
| PFC-miR-384-3p | 0.012 | .909* |
| PFC-miR-384-5p | 0.007 | .929** |
| PFC-miR-409a-3p | 0.012 | -.910* |
| PFC-miR-409a-5p | 0.040 | -.831* |
| PFC-miR-411-3p | 0.008 | -.925** |
| PFC-miR-412-5p | 0.003 | -.955** |
| PFC-miR-433-3p | 0.024 | -.870* |
| PFC-miR-449a-5p | 0.001 | .976** |
| PFC-miR-485-3p | 0.017 | -.892* |
| PFC-miR-493-5p | 0.040 | -.832* |
| PFC-miR-497-5p | 0.005 | .941** |
| PFC-miR-541-5p | 0.005 | -.941** |
| PFC-miR-598-3p | 0.003 | -.958** |
| PFC-miR-6319 | 0.046 | -.820* |
| PFC-miR-6331 | 0.018 | -.890* |
| PFC-miR-671 | 0.016 | -.896* |
| PFC-miR-674-3p | 0.007 | -.930** |
| PFC-miR-708-5p | 0.036 | .841* |
| PFC-miR-760-3p | 0.010 | -.915* |
| PFC-miR-770-3p | 0.017 | -.892* |
| PFC-miR-7a-1-3p | 0.031 | .852* |
| PFC-miR-93-3p | 0.011 | .912* |
| PFC-miR-93-5p | 0.033 | .848* |

Expression of 88 miRNAs was correlated (fdr<0.05) with forced swim test escape time in male animals; n=6. abbreviations: PFC-prefrontal cortex.

**Supplementary Table *2*. Validated gene targets of significant MS**

**miRNAs**

Using miRWalk 2.0, we found 13 validated targets of miRNAs which

were significantly altered in MS animals.

**Supplementary Table 3. Top 20 miRWalk predicted MS miRNA gene targets**

miRWalk 2.0 was used to predict targets for miRNAs significantly affected by MS. 1,848 miRNAs were predicted targets based on agreement between at least 6 prediction software in miRWalk. The top 20 significantly predicted (fdr<0.05) targets with the most targeting miRNAs are listed.

**Supplementary Table *4*. Validated gene targets of significant**

**sex-mediated MS miRNAs**

miRWalk identified 31 validated gene targets of miRNAs which

were significantly altered by MS and Sex.

**Supplementary Table 5.** **Top 20 miRWalk predicted MS x sex miRNA gene targets.**

1,988 gene targets of miRNAs significantly affected by the interaction between MS

and sex were predicted by at least 6 software within miRWalk 2.0. The top 20

significantly predicted (fdr<0.05) targets with the most targeting miRNAs are listed.
